# Supplementary material
Source: publisher figshare collection journal article supplement (https://gsajournals.figshare.com/ndownloader/files/13669592)
Supplement: Supplementary file 1 [file 13669592]

## Sheet: Sheet1
Strain name	Genotype
KRY517	kryEx517[pro-1p::QF::GR LBD::SL::mCherry; quas::GFP unc-119(+)]; unc-119(ed3) III
KRY554	kryEx554[egl-17p::QF::GR LBD::SL::mCherry; quas::GFP unc-119(+)]; unc-119(ed3) III)
KRY566	kryEx566[atf-8p::QF::GR LBD::SL::mCherry; quas::GFP unc-119(+)]; unc-119(ed3) III)
KRY579	kryEx579[egl-17p::QF::GR LBD::SL::mCherry; quas::peel-1 unc-119(+)]; unc-119(ed3) III)
KRY532	kryEx532[pro-1p::QF::GR LBD::SL::mCherry; quas::lin-3c cDNA unc-119(+)]; unc-119(ed3) III)
KRY541	kryEx541[pro-1p::QF::GR LBD::SL::mCherry; pro-1p::QS::SL::mCherry; quas::GFP unc-119(+)]; unc-119(ed3) III (Line #1)
KRY542	kryEx544[pro-1p::QF::GR LBD::SL::mCherry; pro-1p::QS::SL::mCherry; quas::GFP unc-119(+)]; unc-119(ed3) III)
KRY548	kryEx548[quas::GFP unc-119(+)]; unc-119(ed3) III)
KRY555	kryEx555[eef-1A.1p::QF::GR LBD::SL::mCherry; quas::GFP unc-119(+)]; unc-119(ed3) III)
KRY522	kryEx522[hsp::GR LBD::eGFP; myo-2p::tdtomato]
KRY574	kryEx574[hsp::3X FLAG::GR LBD::DAF-16A cDNA; myo-p::tdtomato]
